# Supplementary material for: Co nanoparticles supported on mixed magnesium–lanthanum oxides: effect of calcium and barium addition on ammonia synthesis catalyst performance
Source: Royal Society of Chemistry journal article supplement (doi:10.1039/d3ra00133d), 2023-01-01
Supplement: d3ra00133d1.pdf [file d3ra00133d1.pdf]

## **Supplementary material**

### **Co nanoparticles supported on mixed magnesium–lanthanum oxides: Effect of calcium and barium addition on ammonia synthesis catalyst performance**

Hubert Ronduda <sup>a</sup>, Magdalena Zybert <sup>a</sup>, Wojciech Patkowski <sup>a</sup>, Dariusz Moszyński <sup>b</sup>, Aleksander Albrecht <sup>b</sup>, Kamil Sobczak <sup>c</sup>, Artur Małolepszy <sup>d</sup>, and Wioletta Raróg-Pilecka <sup>a\*</sup>

<sup>a</sup> Warsaw University of Technology, Faculty of Chemistry, Noakowskiego 3, 00-664, Warsaw, Poland

<sup>b</sup> West Pomeranian University of Technology in Szczecin, Faculty of Chemical Technology and Engineering, 42 Piastów Ave, 71-065 Szczecin, Poland

<sup>c</sup> University of Warsaw Biological and Chemical Research Centre, Żwirki i Wigury 101, 02-089 Warsaw, Poland

<sup>d</sup> Warsaw University of Technology, Faculty of Chemical and Process Engineering, Waryńskiego 1, 00-645 Warsaw, Poland

\*Corresponding author

e-mail: [wioletta.pilecka@pw.edu.pl](mailto:wioletta.pilecka@pw.edu.pl)

tel. +48 22 234 57 66

Number of pages: 6

Number of figures: 7

Number of tables: 1

**Table S1.** The composition of the Co catalysts obtained by XRF.

| Entry | Catalyst     | Chemical composition (wt%) |      |      |      |     |     |
|-------|--------------|----------------------------|------|------|------|-----|-----|
|       |              | Co                         | Mg   | La   | K    | Ca  | Ba  |
| 1     | Co           | 44.4                       | 15.7 | 16.1 | 0.16 | –   | –   |
| 2     | 0.5Ca–Co     | 42.9                       | 16.7 | 15.9 | 0.19 | 0.7 | –   |
| 3     | 1Ca–Co       | 42.6                       | 15.7 | 15.6 | 0.18 | 1.2 | –   |
| 4     | 3Ca–Co       | 41.7                       | 14.9 | 15.4 | 0.25 | 3.3 | –   |
| 5     | 5Ca–Co       | 42.7                       | 15.7 | 15.1 | 0.19 | 5.5 | –   |
| 6     | 7Ca–Co       | 36.9                       | 14.2 | 13.7 | 0.22 | 6.9 | –   |
| 7     | 9Ca–Co       | 37.2                       | 14.2 | 13.5 | 0.21 | 9.9 | –   |
| 8     | 0.5Ba–Co     | 41.0                       | 14.8 | 14.7 | 0.11 | –   | 0.4 |
| 9     | 1Ba–Co       | 41.7                       | 15.6 | 15.3 | 0.12 | –   | 0.8 |
| 10    | 3Ba–Co       | 41.6                       | 15.5 | 14.4 | 0.08 | –   | 2.4 |
| 11    | 5Ba–Co       | 40.9                       | 14.7 | 13.9 | 0.06 | –   | 4.5 |
| 12    | 7Ba–Co       | 39.2                       | 15.9 | 13.0 | 0.05 | –   | 6.3 |
| 13    | 9Ba–Co       | 39.3                       | 16.3 | 12.8 | 0.05 | –   | 8.3 |
| 14    | (5Ca+5Ba)–Co | 36.4                       | 14.3 | 11.9 | 0.06 | 5.0 | 3.9 |

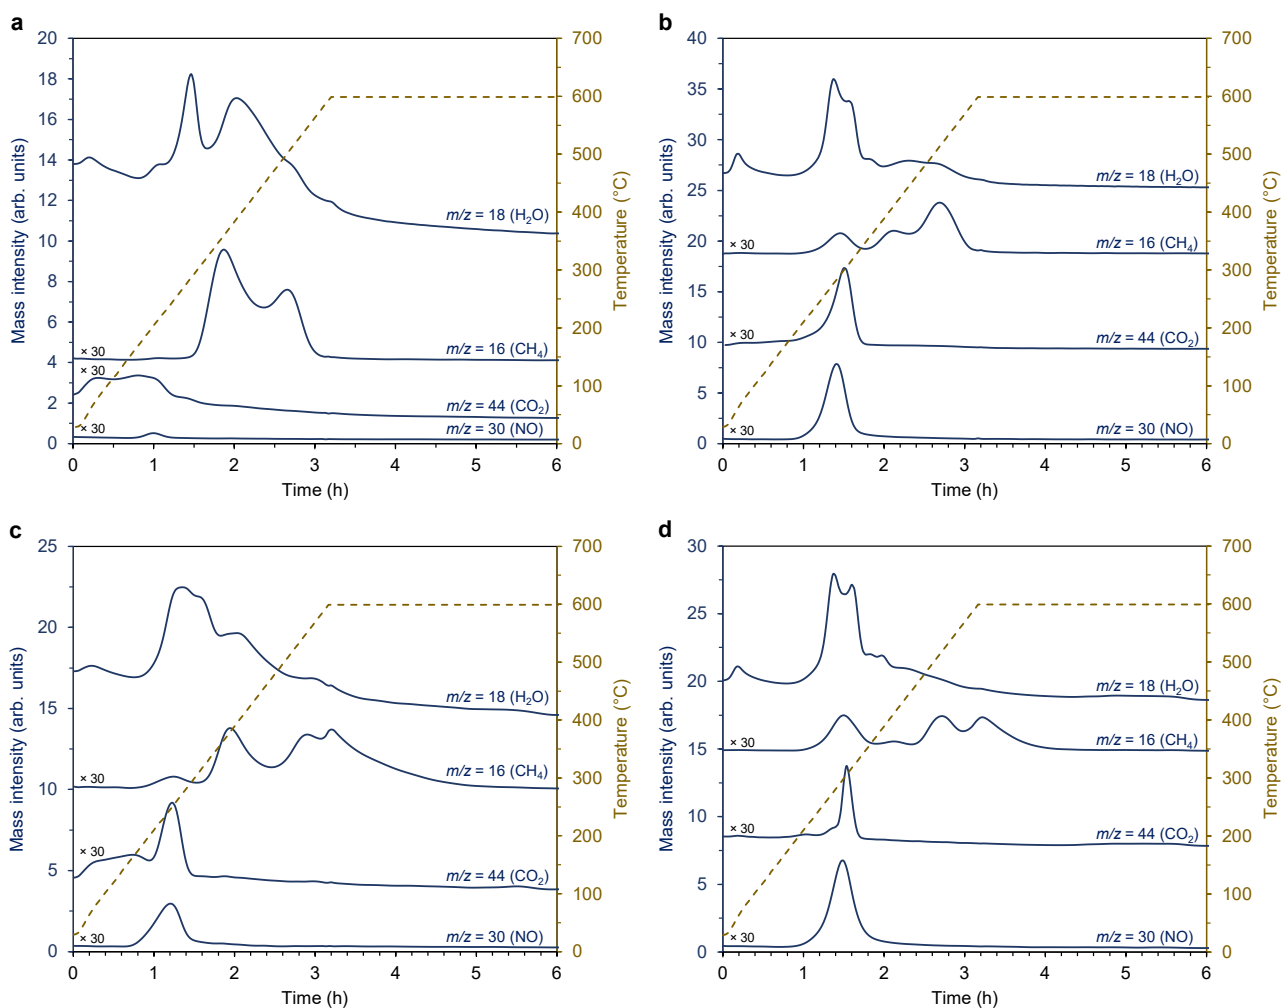

**Figure S1.** TPR-MS profiles of the as-prepared Co catalysts. **a** Co. **b** 5Ca-Co. **c** 5Ba-Co. **d** (5Ca+5Ba)-Co. The TPR-MS profiles of the as-prepared Co catalysts indicated that the H<sub>2</sub>O, CH<sub>4</sub>, CO<sub>2</sub>, and NO formation was completed at about 600 °C.

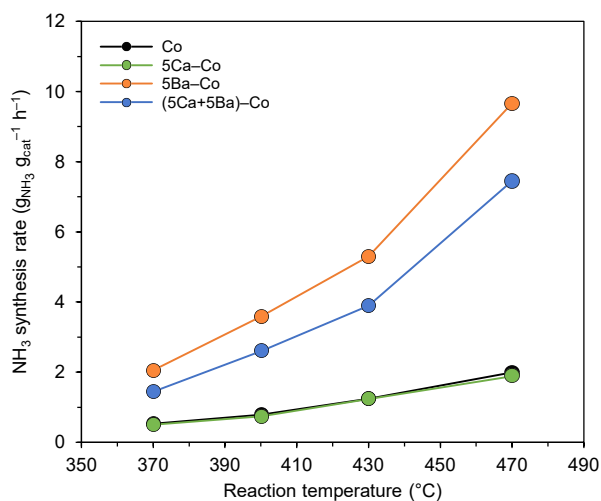

**Figure S2.** Temperature dependence of the ammonia synthesis rate of Co catalysts at 6.3 MPa. The rates were measured in the reaction mixture without ammonia.

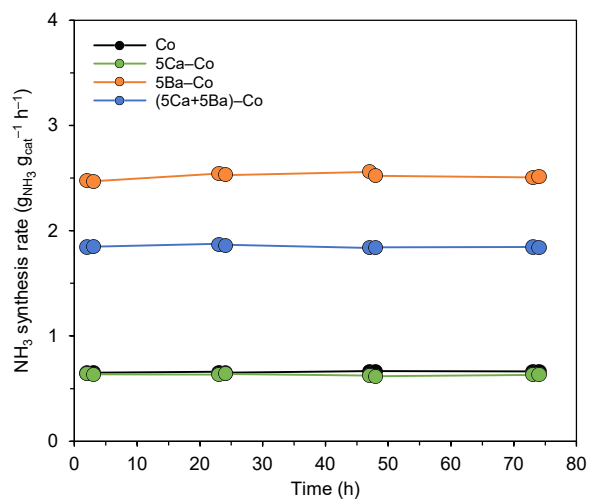

**Figure S3.** Time dependence of ammonia synthesis rate over Co catalysts at 370 °C and 9.0 MPa. The rates were measured in the reaction mixture without ammonia.

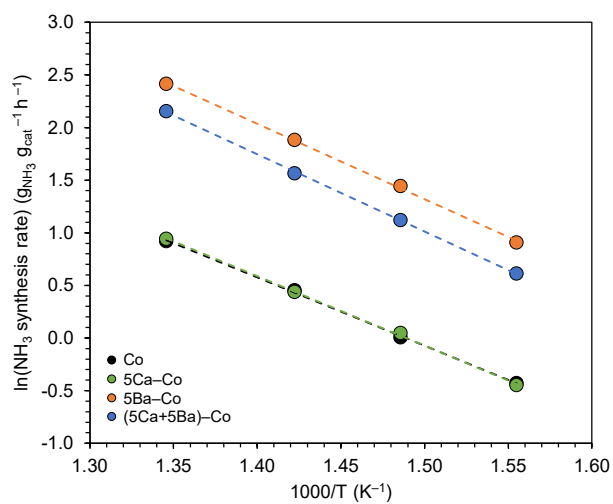

**Figure S4.** Arrhenius plots for NH<sub>3</sub> synthesis over the Co catalysts.

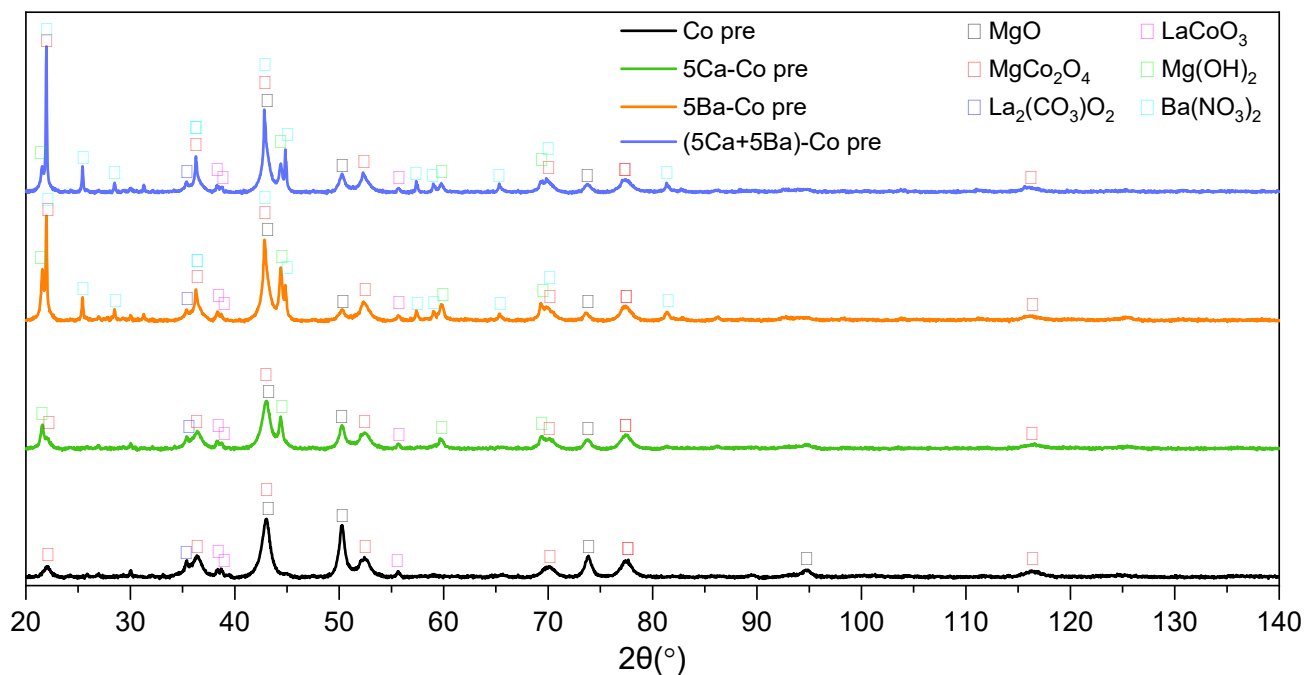

**Figure S5.** Diffractograms of the Co catalyst precursors collected under N<sub>2</sub> flow at 25 °C.

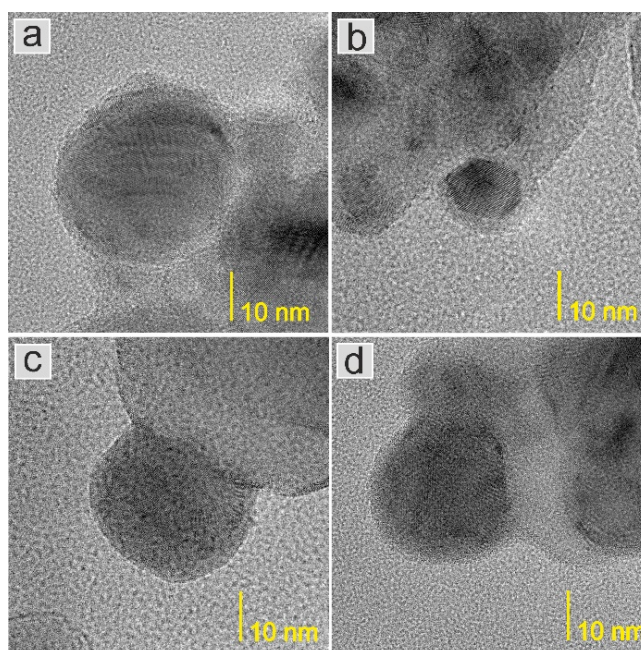

**Figure S6.** HR-TEM images of the Co catalysts. **a** Co. **b** 5Ca-Co. **c** 5Ba-Co. **d** (5Ca+5Ba)-Co. The crystal structure of the Co nanoparticles was identified as the face-centred-cubic (fcc).

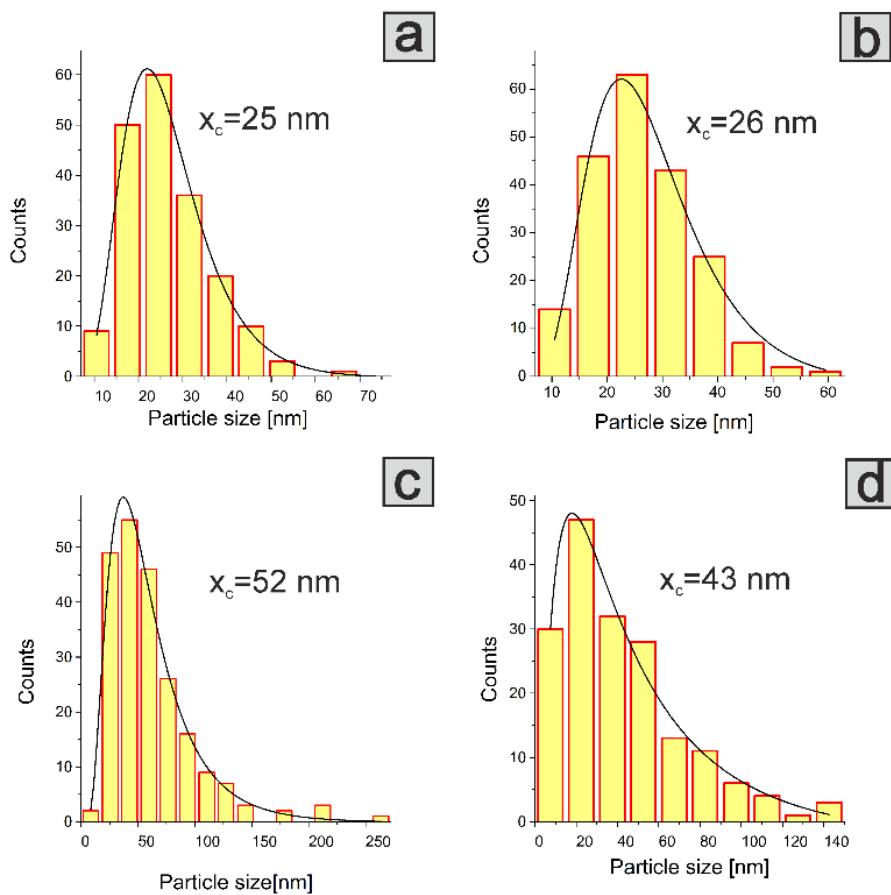

**Figure S7.** Co particle size distribution histograms for the Co catalysts. **a** Co. **b** 5Ca-Co. **c** 5Ba-Co. **d** (5Ca+5Ba)-Co.
